# Supplementary material for: The Quantitative Methods Boot Camp: Teaching Quantitative Thinking and Computing Skills to Graduate Students in the Life Sciences
Source: PubMed Central journal article supplement (PMC4399943; doi:10.1371/journal.pcbi.1004208), 2015-04-16
Supplement: pcbi.1004208.s005.pdf [file pcbi.1004208.s005.pdf]

## Uses of Learning Catalytics[1]

|                                                                                                                                                                                                                                                                                 |
|---------------------------------------------------------------------------------------------------------------------------------------------------------------------------------------------------------------------------------------------------------------------------------|
| <b>Automated response system to ask questions during class</b>                                                                                                                                                                                                                  |
| Uses: <ul style="list-style-type: none"><li>- Gauge students' understanding of concepts in real time</li><li>- Tailor and pace instruction to needs of the class</li><li>- Conduct think-pair-share exercises[2]</li><li>- Poll students about feelings and attitudes</li></ul> |
| <b>Electronic seating chart</b>                                                                                                                                                                                                                                                 |
| Uses: <ul style="list-style-type: none"><li>- Record students' attendance</li><li>- Learn students' names more quickly</li><li>- Identify individual students who find a concept difficult and help them</li><li>- Answer individual questions</li></ul>                        |
| <b>Self-paced study modules</b>                                                                                                                                                                                                                                                 |
| Uses: <ul style="list-style-type: none"><li>- Allow students to make their way through longer in-class exercises step-by-step</li><li>- Record answers to homework questions and provide immediate automated feedback</li><li>- Enable automatic grading</li></ul>              |

## References

- [1] Schell J, Lukoff B, Mazur E (2013) Increasing Student Engagement and Retention using Classroom Technologies: Classroom Response Systems and Mediated Discourse Technologies, Emerald, chapter Catalyzing Learner Engagement Using Cutting-Edge Classroom Response Systems in Higher Education. Cutting-edge Technologies in Higher Education. pp. 233-261. URL <http://mazur-www.harvard.edu/publications.php?function=display&rowid=701>.
- [2] McTighe J, Lyman FT (1988) Cueing thinking in the classroom: The promise of theory-embedded tools. Educational Leadership 45: 18-24.
